# Supplementary material
Source: PubMed Central journal article supplement (PMC5835145)

YMTHE, Volume 26

## **Supplemental Information**

### **Irradiation Enhances Abscopal Anti-tumor Effects of Antigen-Specific Immunotherapy through Regulating Tumor Microenvironment**

**Ming-Cheng Chang, Yu-Li Chen, Han-Wei Lin, Ying-Cheng Chiang, Chi-Fang Chang, Shu-Feng Hsieh, Chi-An Chen, Wei-Zen Sun, and Wen-Fang Cheng**

## Supplementary Figures and Legends

### Supplementary Figure 1. Alterations of CD4<sup>+</sup> and CD8<sup>+</sup> lymphocytes in splenocytes of

mice with tumors treated using various doses of whole-body irradiation. Representative

images (A) and bar figures (B) showing flow cytometry analysis of CD4<sup>+</sup> and CD8<sup>+</sup>

lymphocytes at day 21 in various experimental groups: naïve (no tumor and no irradiation),

tumor + whole-body irradiation 80 cGy, tumor + whole-body irradiation 150 cGy, tumor +

whole-body irradiation 300 cGy ( $n = 5$  per group). Bar figure data are shown as mean  $\pm$  SD.

*Note:* The percentages of CD4<sup>+</sup> and CD8<sup>+</sup> lymphocytes, respectively, in splenocytes at day 35

were as follows: naïve,  $19.2 \pm 0.5\%$ ,  $7.9 \pm 0.1\%$ ; tumor + whole-body irradiation 80 cGy,

$16.7 \pm 0.4\%$ ,  $6.7 \pm 0.3\%$ ; tumor + whole-body irradiation 150 cGy,  $13.1 \pm 0.4\%$ ,  $5.7 \pm 0.5\%$ ;

and tumor + whole-body irradiation 300 cGy,  $9.8 \pm 0.6\%$ ,  $5.0 \pm 0.6\%$  ( $P < 0.001$ ,  $P = 0.002$ ,

one-way ANOVA).

Supplementary Figure 1

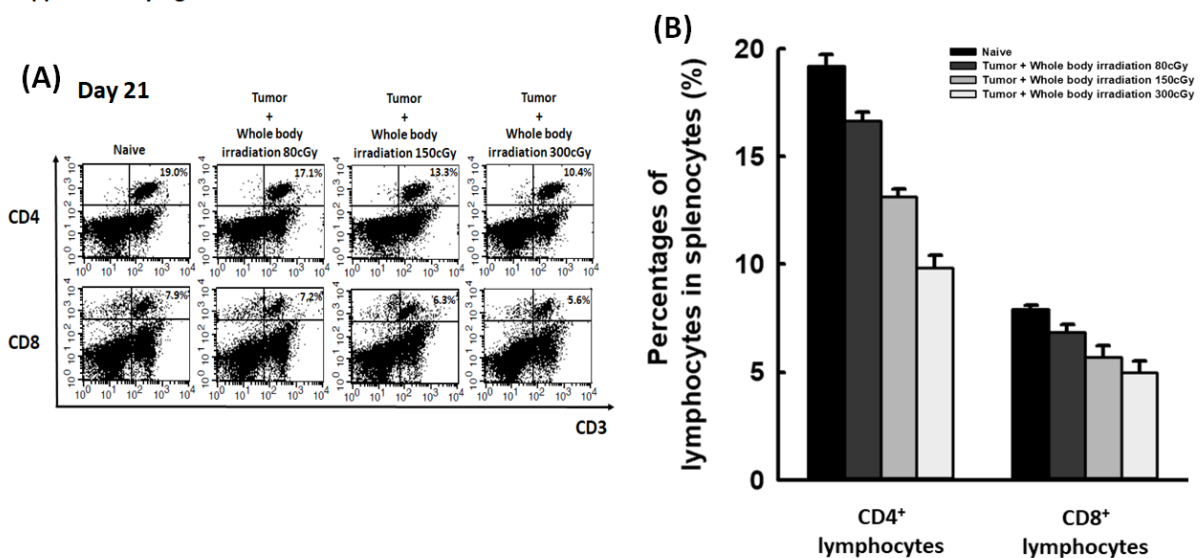

## Supplementary Figure 2. Antigen/epitope-specific IFN- $\gamma$ -secreting CD8<sup>+</sup> cytotoxic T

cells in various treatment groups. Representative figures of the flow cytometry analysis of different antigen/epitope-specific IFN- $\gamma$ -secreting CD8<sup>+</sup> cytotoxic T cells in various treatment groups ( $n = 5$  per group). *Note:* Only E7-specific IFN- $\gamma$ -secreting CD8<sup>+</sup> T cells were induced in the mice treated with the CTGF/E7 DNA vaccine alone or with the CTGF/E7 DNA vaccine plus 6-Gy local irradiation.

### Supplementary Figure 2

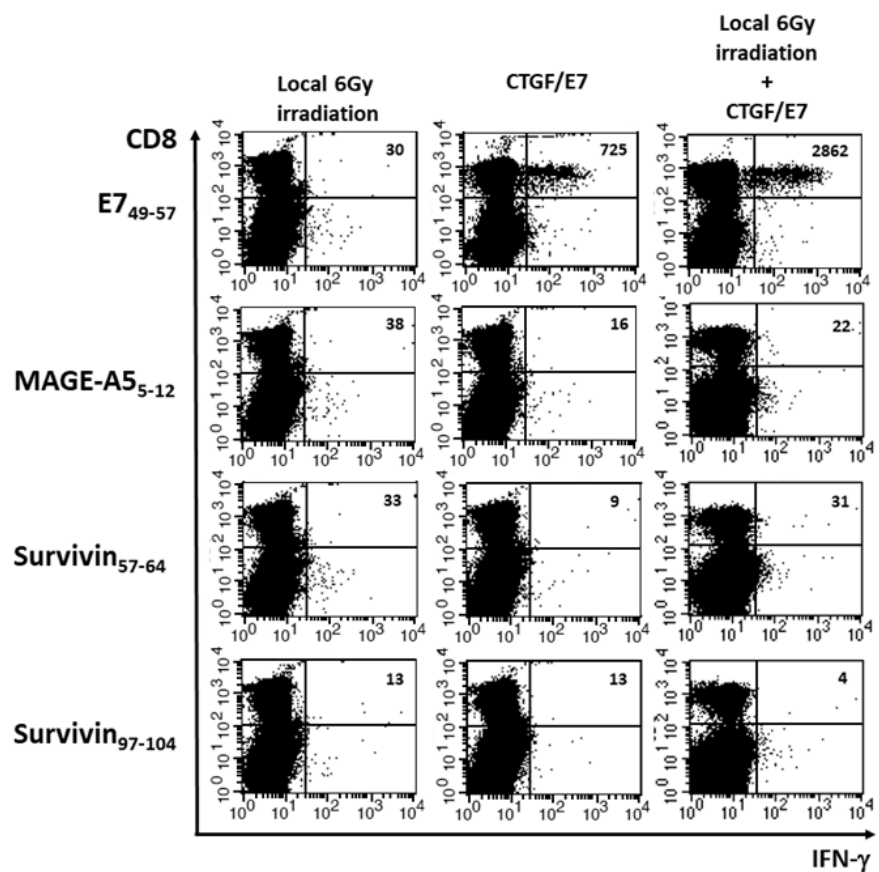

**Supplementary Figure 3. Other infiltrating immunocytes following treatment within**

**index tumors.** Representative images showing immunofluorescence staining of other infiltrating immunocytes in the index tumor treated with 6-Gy local irradiation plus the CTGF/E7 DNA vaccine. A, macrophage (blue, DAPI; red, F4/80); B, neutrophil (blue, DAPI; red, Ly6g<sup>+</sup>); C, B lymphocytes (blue, DAPI; red, CD19); D, Tregs (blue, DAPI; red, FoxP3; green, CD4) (*n* = 5 per group).

**Supplementary Figure 3**

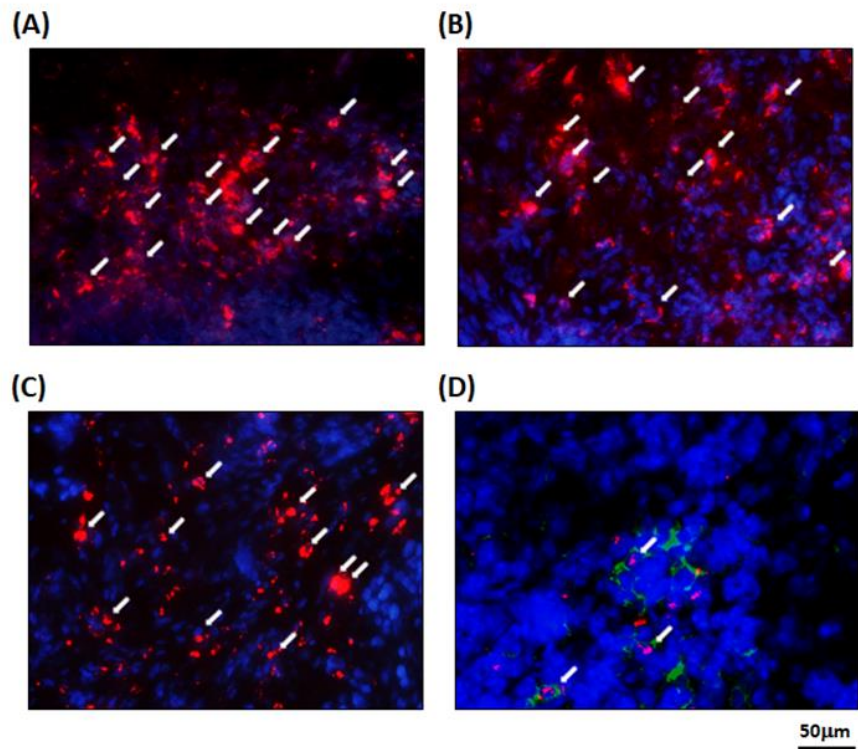

**Supplementary Figure 4. The numbers of E7-specific IFN- $\gamma$ -secreting CD8<sup>+</sup> T cells in tumor-bearing mice treated with whole-body irradiation (overall treatment period = 2 weeks) and/or CTGF/E7 DNA vaccine. (A) Representative figures of flow cytometry analysis of the numbers of E7-specific IFN- $\gamma$ -secreting CD8<sup>+</sup> T cells in mice treated with whole-body irradiation and/or CTGF/E7 DNA vaccine ( $n = 5$  per group). (B) Bar figures indicating the numbers of E7-specific IFN- $\gamma$ -secreting CD8<sup>+</sup> T cells in mice treated with whole-body irradiation and/or CTGF/E7 DNA vaccine ( $n = 5$  per group). Data are shown as mean  $\pm$  SD. *Note:* The numbers of E7-specific IFN- $\gamma$ -secreting CD8<sup>+</sup> T cells in splenocytes were as follows: CTGF/E7, 885.1  $\pm$  35.1%; CTGF/E7 + whole-body irradiation 80 cGY, 767.7  $\pm$  55.9%; CTGF/E7 + whole-body irradiation 150 cGY, 446.3  $\pm$  21.0%; and CTGF/E7 + whole-body irradiation 300 cGY, 310.7  $\pm$  39.6% ( $P < 0.001$ , one-way ANOVA).**

**Supplementary Figure 4**

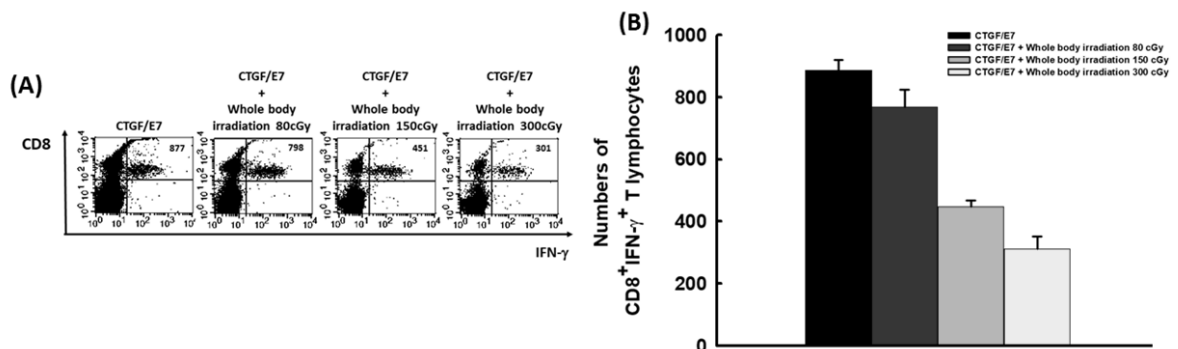

**Supplementary Figure 5. Mouse index and distant tumors.** Representative images

showing mouse index tumors (yellow circle, treated with DNA vaccine plus local irradiation) and distant tumors (white circle, untreated) on day 21. A, CTGF/E7 + 3-Gy local RT; B, CTGF/E7 + 6-Gy local RT; C, CTGF/E7 + 12-Gy local RT. ( $n = 5$  per group). *Note:* The skin wound (red arrow) with poor healing and progression was observed starting on day 16.

**Supplementary Figure 5**

**Day21**

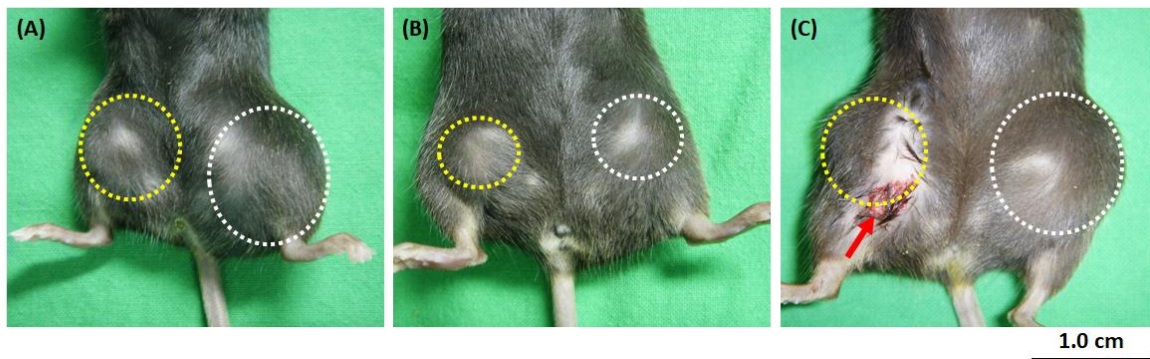

### Supplementary Figure 6. MHC class I-expressing TC-1 tumor cells in different

**treatment groups.** Bar figures indicating the percentage of MHC class I-expressing TC-1

tumor cells in groups treated without or with irradiation (3, 6, or 12 Gy) at the indicated

intervals (0 and 24 h) ( $n = 3$  per group). Data are shown as mean  $\pm$  SD. *Note:* The

percentages of MHC class I-expressing cells were as follows: 0-h group: 0-Gy irradiation,

$82.1 \pm 1.8\%$ ; 3-Gy irradiation,  $81.1 \pm 1.2\%$ ; 6-Gy irradiation,  $83.3 \pm 1.5\%$ ; 12-Gy irradiation,

$83.8 \pm 1.2\%$  ( $P = 0.09$ , one-way ANOVA); 24-h group: 0-Gy irradiation,  $81.4 \pm 1.5\%$ ; 3-Gy

irradiation,  $94.1 \pm 1.7\%$ ; 6-Gy irradiation,  $94.6 \pm 1.6\%$ ; 12-Gy irradiation,  $92.6 \pm 0.9\%$  ( $P <$

$0.001$ , one-way ANOVA).

### Supplementary Figure 6

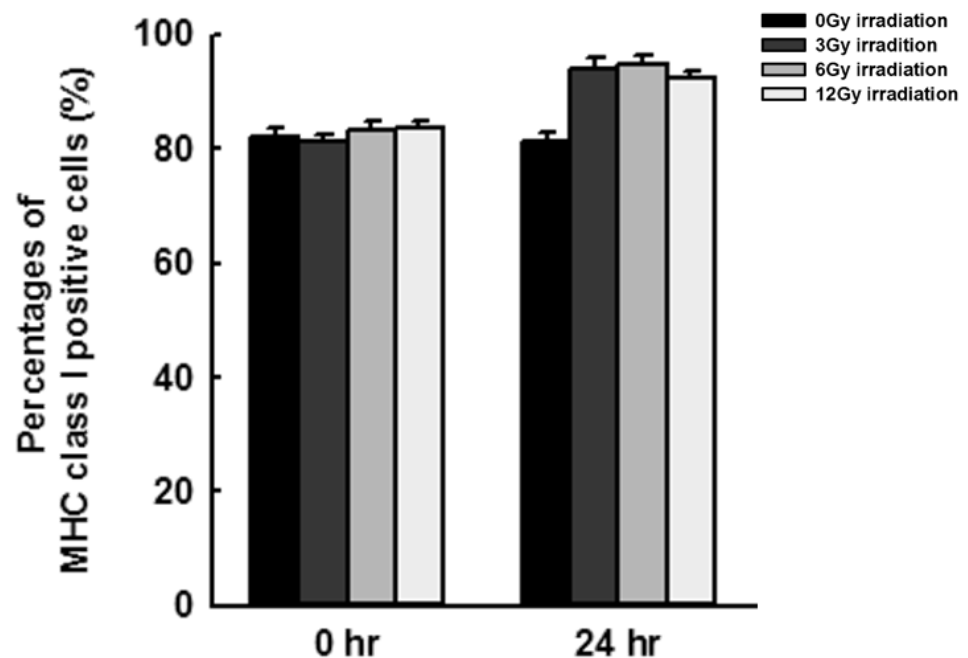

Supplement: mmc1.pdf [file mmc1.pdf]
